# Supplementary material for: The Effect of Strengthened Physical Education on Academic Achievements in High School Students: A Quasi-Experiment in China
Source: MDPI journal article supplement (doi:10.3390/ijerph16234688), 2019-11-25
Supplement: s1 [file s1]

**Table S1. Associations of Strengthened Physical Education with Academic Performance among Group Sports and Individual Sports in Two and Three Semester Follow-up.**

| <i>Panel A. Effect on Change in Scores By Sports Type Over Two Semesters</i> |         |                    |               |                |                    |
|------------------------------------------------------------------------------|---------|--------------------|---------------|----------------|--------------------|
|                                                                              |         | <b>Coefficient</b> | <b>95% CI</b> | <b>p-value</b> | <b>Sample Size</b> |
| Group Sports                                                                 |         |                    |               |                |                    |
|                                                                              | Chinese | 0.61               | [0.48,0.74]   | <0.001         | 310                |
|                                                                              | English | 0.26               | [0.12,0.40]   | 0.02           | 310                |
|                                                                              | Maths   | -0.18              | [-0.32,-0.04] | <0.001         | 310                |
| Individual Sports                                                            |         |                    |               |                |                    |
|                                                                              | Chinese | 0.59               | [0.31,0.87]   | <0.001         | 302                |
|                                                                              | English | 0.26               | [0.12,0.39]   | <0.001         | 302                |
|                                                                              | Maths   | -0.37              | [-0.56,-0.19] | <0.001         | 302                |

  

| <i>Panel B. Effect on Change in Scores Over Three Semesters</i> |         |                    |               |                |                    |
|-----------------------------------------------------------------|---------|--------------------|---------------|----------------|--------------------|
|                                                                 |         | <b>Coefficient</b> | <b>95% CI</b> | <b>p-value</b> | <b>Sample Size</b> |
| Group Sports                                                    |         |                    |               |                |                    |
|                                                                 | Chinese | 0.24               | [0.01,0.47]   | 0.05           | 290                |
|                                                                 | English | -0.13              | [-0.32,0.07]  | 0.18           | 290                |
|                                                                 | Maths   | -0.20              | [-0.37,-0.03] | 0.02           | 290                |
| Individual Sports                                               |         |                    |               |                |                    |
|                                                                 | Chinese | 0.27               | [-0.01,0.54]  | 0.06           | 282                |
|                                                                 | English | -0.25              | [-0.47,-0.03] | 0.03           | 282                |
|                                                                 | Maths   | -0.26              | [-0.43,-0.09] | 0.01           | 282                |

Notes: Group sports include football, volleyball, and aerobics.

Individual sports include badminton, table tennis and tennis.
